# Supplementary material for: The Regulatory Cross-Talk between microRNAs and Novel Members of the B7 Family in Human Diseases: A Scoping Review
Source: PubMed Central journal article supplement (PMC7962059; doi:10.3390/ijms22052652), 2021-03-06
Supplement: ijms-22-02652-s001.pdf [file ijms-22-02652-s001.pdf]

| PubMed search history. |                                                                                                                                                                                                                                                                                                                                                                                                                                                                                                                                                                                                                                                                                                                                                                                                                                             |         |         |
|------------------------|---------------------------------------------------------------------------------------------------------------------------------------------------------------------------------------------------------------------------------------------------------------------------------------------------------------------------------------------------------------------------------------------------------------------------------------------------------------------------------------------------------------------------------------------------------------------------------------------------------------------------------------------------------------------------------------------------------------------------------------------------------------------------------------------------------------------------------------------|---------|---------|
| Search number          | Query                                                                                                                                                                                                                                                                                                                                                                                                                                                                                                                                                                                                                                                                                                                                                                                                                                       | Filters | Results |
| 18                     | #16 AND #17                                                                                                                                                                                                                                                                                                                                                                                                                                                                                                                                                                                                                                                                                                                                                                                                                                 |         | 45      |
| 17                     | #14 OR #15                                                                                                                                                                                                                                                                                                                                                                                                                                                                                                                                                                                                                                                                                                                                                                                                                                  |         | 129,732 |
| 16                     | #1 OR #2 OR #3 OR #4 OR #5 OR #6 OR #7 OR #8 OR #9 OR #10 OR #11 OR #12 OR #13                                                                                                                                                                                                                                                                                                                                                                                                                                                                                                                                                                                                                                                                                                                                                              |         | 2,820   |
| 15                     | "MicroRNAs"[Mesh]                                                                                                                                                                                                                                                                                                                                                                                                                                                                                                                                                                                                                                                                                                                                                                                                                           |         | 83,142  |
| 14                     | ((((((((((((((((((((((((((((MicroRNA[Title]) OR (MicroRNA[Title/Abstract])) OR (MicroRNAs[Title])) OR (MicroRNAs[Title/Abstract])) OR ("Micro RNA"[Title])) OR ("Micro RNA"[Title/Abstract])) OR ("Micro RNAs"[Title])) OR ("Micro RNAs"[Title/Abstract])) OR (miRNA[Title])) OR (miRNA[Title/Abstract])) OR (miRNAs[Title])) OR (miRNAs[Title/Abstract])) OR (pri-miRNA[Title])) OR (pri-miRNA[Title/Abstract])) OR (stRNA[Title])) OR (stRNA[Title/Abstract])) OR ("Small Temporal RNA"[Title])) OR ("Small Temporal RNA"[Title/Abstract])) OR (pre-miRNA[Title])) OR (pre-miRNA[Title/Abstract])) OR (miR[Title])) OR (miR[Title/Abstract])) OR (miRs[Title])) OR (miRs[Title/Abstract])) OR (MIRN[Title])) OR (MIRN[Title/Abstract])) OR (MIRNS[Title])) OR (MIRNS[Title/Abstract])) OR (hsa-miR[Title])) OR (hsa-miR[Title/Abstract])) |         | 125,487 |
| 13                     | (((((ILDR2[Title]) OR (ILDR2[Title/Abstract])) OR ("immunoglobulin like domain containing receptor 2"[Title])) OR ("immunoglobulin like domain containing receptor 2"[Title/Abstract])) OR (C1orf32[Title])) OR (C1orf32[Title/Abstract])) OR (dJ782G3.1[Title])) OR (dJ782G3.1[Title/Abstract]))                                                                                                                                                                                                                                                                                                                                                                                                                                                                                                                                           |         | 16      |
| 12                     | "HHLA2 protein, human" [Supplementary Concept]                                                                                                                                                                                                                                                                                                                                                                                                                                                                                                                                                                                                                                                                                                                                                                                              |         | 17      |
| 11                     | (((((B7H7[Title]) OR (B7H7[Title/Abstract])) OR (B7-H7[Title])) OR (B7-H7[Title/Abstract])) OR (HHLA2[Title])) OR (HHLA2[Title/Abstract])) OR ("HERV-H LTR-associating 2"[Title])) OR ("HERV-H LTR-associating 2"[Title/Abstract]))                                                                                                                                                                                                                                                                                                                                                                                                                                                                                                                                                                                                         |         | 49      |
| 10                     | "NCR3LG1 protein, human" [Supplementary Concept] OR "B7-H6 antigen, human" [Supplementary Concept]                                                                                                                                                                                                                                                                                                                                                                                                                                                                                                                                                                                                                                                                                                                                          |         | 44      |
| 9                      | ((((((((((B7H6[Title]) OR (B7H6[Title/Abstract])) OR (B7-H6[Title])) OR (B7-H6[Title/Abstract])) OR ("B7 homolog 6"[Title])) OR ("B7 homolog 6"[Title/Abstract])) OR (NCR3LG1[Title])) OR (NCR3LG1[Title/Abstract])) OR (DKFZp686O24166[Title])) OR (DKFZp686O24166[Title/Abstract])) OR ("natural killer cell cytotoxicity receptor 3 ligand 1"[Title])) OR ("natural killer cell cytotoxicity receptor 3 ligand 1"[Title/Abstract]))                                                                                                                                                                                                                                                                                                                                                                                                      |         | 106     |
| 8                      | "BTNL2 protein, human" [Supplementary Concept]                                                                                                                                                                                                                                                                                                                                                                                                                                                                                                                                                                                                                                                                                                                                                                                              |         | 78      |
| 7                      | ((((((((((BTNL2[Title]) OR (BTNL2[Title/Abstract])) OR (BTL-II[Title])) OR (BTL-II[Title/Abstract])) OR ("butyrophilin-like MHC class II"[Title])) OR ("butyrophilin-like MHC class II"[Title/Abstract])) OR (BTLII[Title])) OR (BTLII[Title/Abstract])) OR (BTN7[Title])) OR (BTN7[Title/Abstract])) OR (HSBLMHC1[Title])) OR (HSBLMHC1[Title/Abstract])) OR ("butyrophilin like 2"[Title])) OR ("butyrophilin like 2"[Title/Abstract]))                                                                                                                                                                                                                                                                                                                                                                                                   |         | 131     |
| 6                      | "VSIR protein, human" [Supplementary Concept]                                                                                                                                                                                                                                                                                                                                                                                                                                                                                                                                                                                                                                                                                                                                                                                               |         | 46      |
| 5                      | ((((((((((((((((((((((B7H5[Title]) OR (B7H5[Title/Abstract])) OR (B7-H5[Title])) OR (B7-H5[Title/Abstract])) OR ("V-domain Ig suppressor of T cell activation"[Title])) OR ("V-domain Ig suppressor of T cell activation"[Title/Abstract])) OR (VISTA[Title])) OR (VISTA[Title/Abstract])) OR                                                                                                                                                                                                                                                                                                                                                                                                                                                                                                                                               |         | 1,603   |

|   |                                                                                                                                                                                                                                                                                                                                                                                                                                                                                         |  |     |
|---|-----------------------------------------------------------------------------------------------------------------------------------------------------------------------------------------------------------------------------------------------------------------------------------------------------------------------------------------------------------------------------------------------------------------------------------------------------------------------------------------|--|-----|
|   | (Dies1[Title]) OR (Dies1[Title/Abstract]) OR (C10orf54[Title]) OR (C10orf54[Title/Abstract]) OR (VSIR[Title]) OR (VSIR[Title/Abstract]) OR (DD1alpha[Title]) OR (DD1alpha[Title/Abstract]) OR (GI24[Title]) OR (GI24[Title/Abstract]) OR (PD-1H[Title]) OR (PD-1H[Title/Abstract]) OR (PP2135[Title]) OR (PP2135[Title/Abstract]) OR (SISP1[Title]) OR (SISP1[Title/Abstract])                                                                                                          |  |     |
| 4 | "V-Set Domain-Containing T-Cell Activation Inhibitor 1"[Mesh] OR "VTCN1 protein, human" [Supplementary Concept]                                                                                                                                                                                                                                                                                                                                                                         |  | 251 |
| 3 | ((((((((((((B7H4[Title]) OR (B7H4[Title/Abstract])) OR (B7-H4[Title]) OR (B7-H4[Title/Abstract])) OR (B7x[Title]) OR (B7x[Title/Abstract])) OR (B7S1[Title]) OR (B7S1[Title/Abstract])) OR ("V-set domain containing T cell activation inhibitor 1"[Title]) OR ("V-set domain containing T cell activation inhibitor 1"[Title/Abstract])) OR (VTCN1[Title]) OR (VTCN1[Title/Abstract])) OR (VCTN1[Title]) OR (VCTN1[Title/Abstract])) OR (PRO1291[Title]) OR (PRO1291[Title/Abstract])) |  | 439 |
| 2 | "CD276 protein, human" [Supplementary Concept]                                                                                                                                                                                                                                                                                                                                                                                                                                          |  | 256 |
| 1 | ((((((((((((B7H3[Title]) OR (B7H3[Title/Abstract])) OR (B7-H3[Title]) OR (B7-H3[Title/Abstract])) OR ("B7 homolg 3"[Title]) OR ("B7 homolg 3"[Title/Abstract])) OR (CD276[Title]) OR (CD276[Title/Abstract])) OR (4Ig-B7-H3[Title]) OR (4Ig-B7-H3[Title/Abstract]))                                                                                                                                                                                                                     |  | 630 |

## Embase search history.

| No. | Query                                                                                                                                                                                                                                                                       | Results |
|-----|-----------------------------------------------------------------------------------------------------------------------------------------------------------------------------------------------------------------------------------------------------------------------------|---------|
| #18 | #16 AND #17                                                                                                                                                                                                                                                                 | 96      |
| #17 | #14 OR #15                                                                                                                                                                                                                                                                  | 181266  |
| #16 | #1 OR #2 OR #3 OR #4 OR #5 OR #6 OR #7 OR #8 OR #9 OR #10 OR #11 OR #12 OR #13                                                                                                                                                                                              | 5149    |
| #15 | 'microrna'/exp                                                                                                                                                                                                                                                              | 165210  |
| #14 | microrna:ti,ab OR micrnas:ti,ab OR 'micro rna':ti,ab OR 'micro rnas':ti,ab OR mirna:ti,ab OR mirnas:ti,ab OR 'pri mirna':ti,ab OR strna:ti,ab OR 'small temporal rna':ti,ab OR 'pre mirna':ti,ab OR mir:ti,ab OR mirs:ti,ab OR mirn:ti,ab OR mirms:ti,ab OR 'hsa mir':ti,ab | 162180  |
| #13 | ildr2:ti,ab OR 'immunoglobulin like domain containing receptor 2':ti,ab OR c1orf32:ti,ab OR dj782g3.1:ti,ab                                                                                                                                                                 | 28      |
| #12 | 'hhla2 protein'/exp                                                                                                                                                                                                                                                         | 13      |
| #11 | b7h7:ti,ab OR 'b7 h7':ti,ab OR hhla2:ti,ab OR 'herv-h ltr-associating 2':ti,ab                                                                                                                                                                                              | 76      |
| #10 | 'b7 h6 protein'/exp OR 'b7 h6 antigen'/exp                                                                                                                                                                                                                                  | 35      |
| #9  | b7h6:ti,ab OR 'b7 h6':ti,ab OR 'b7 homolog 6':ti,ab OR ncr3lg1:ti,ab OR dkfzp686o24166:ti,ab OR 'natural killer cell cytotoxicity receptor 3 ligand 1':ti,ab                                                                                                                | 154     |
| #8  | 'btnl2 gene'/exp OR 'btnl2 protein'/exp OR 'butyrophilin like 2'/exp OR 'butyrophilin like 2 protein'/exp                                                                                                                                                                   | 90      |
| #7  | btnl2:ti,ab OR 'btl ii':ti,ab OR 'butyrophilin-like mhc class ii':ti,ab OR btlii:ti,ab OR btn7:ti,ab OR hsblmhc1:ti,ab OR 'butyrophilin like 2':ti,ab                                                                                                                       | 201     |
| #6  | 'v domain ig suppressor of t cell activation'/exp                                                                                                                                                                                                                           | 15      |
| #5  | b7h5:ti,ab OR 'b7 h5':ti,ab OR 'v-domain ig suppressor of t cell activation':ti,ab OR vista:ti,ab OR dies1:ti,ab OR c10orf54:ti,ab OR vsir:ti,ab OR dd1alpha:ti,ab OR gi24:ti,ab OR 'pd 1h':ti,ab OR pp2135:ti,ab OR sisp1:ti,ab                                            | 3070    |
| #4  | 'v set domain containing t cell activation inhibitor 1'/exp OR 'b7 h4 gene'/exp OR 'vtcn1 protein human'/exp                                                                                                                                                                | 527     |
| #3  | b7h4:ti,ab OR 'b7 h4':ti,ab OR b7x:ti,ab OR b7s1:ti,ab OR 'v-set domain containing t cell activation inhibitor 1':ti,ab OR vtcn1:ti,ab OR vctn1:ti,ab OR pro1291:ti,ab                                                                                                      | 693     |
| #2  | 'b7h3 protein'/exp OR 'b7 h3 protein'/exp OR 'b7 h3 antigen'/exp OR 'b7 h3 gene'/exp OR 'b7 homolog 3 protein'/exp OR 'cd276 antigen'/exp OR 'cd276 protein human'/exp OR 'cd276 gene'/exp                                                                                  | 354     |
| #1  | b7h3:ti,ab OR 'b7 h3':ti,ab OR 'b7 homolog 3':ti,ab OR cd276:ti,ab OR '4ig b7 h3':ti,ab                                                                                                                                                                                     | 1061    |
